# Supplementary material
Source: PubMed Central journal article supplement (PMC3538243)
Supplement: 1214682110_pnas.201214682SI.pdf [file 1214682110_pnas.201214682SI.pdf]

# Supporting Information

Hwang et al. 10.1073/pnas.1214682110

## SI Materials and Methods

**Mice.** Six- to eight-week-old C57BL/6 mice were purchased from Orient Bio and maintained in the Sogang University animal facility under specific-pathogen free conditions. The generation of RHD7-deficient mice (1), pSico-YY1 transgenic mice (2), and GATA3<sup>fllox</sup>-mice (3) has been described previously. CD4-Cre transgenic mice were purchased from Taconic. Experiments with live mice were approved by the Sogang University Institutional Animal Care and Use Committee.

**EMSA.** Preparation of nuclear extracts has been described previously (4). The oligonucleotide sequences used are as follows. RHD7b: 5'-ATGAGCAAAAATGTCCCCATACACCCACTC-3'; RHD7b-mutant: 5'-ATGAGCAAAAATGT444CATACACCCACTC-3'; YY1-consensus: 5'-TGCCTTGCAAAAATGGCGTTACTGCAG-3'. The core YY1-binding sequence is underlined.

**ChIP-Quantitative PCR.** Cells ( $1 \times 10^7$ ) were cross-linked with 1% paraformaldehyde on ice for 30 min and quenched with 0.125 M glycine. Cells were then lysed with a buffer containing 1% SDS and sonicated at the high-power setting for 15 min using a Bioruptor sonicator (Diagenode). Cell extracts were precleared with protein A/G agarose/salmon sperm DNA (Upstate) and incubated with a mixture of anti-trimethyl-H3K4 and anti-monomethyl H3K4 (Millipore 07-473 and 07-436, respectively), anti-acetyl H3 (Upstate 06-599), anti-GATA3 (Santa Cruz, sc-268ac), anti-YY1 (mixture of Santa Cruz sc-1703x, sc-7341x, and Abcam 12132), or normal rabbit IgG or normal mouse IgG (Santa Cruz) as a negative control. Antibody-bound chromatin was precipitated by protein A/G agarose, washed, and eluted with a buffer containing sodium bicarbonate-SDS. The chromatin was reverse cross-linked by incubating at 65 °C for 4 h, followed by protease K treatment. The amount of precipitated DNA was quantified by quantitative PCR using the SYBR green (Kappa Bio) method with the primers listed in Table S1.

**In Vitro Differentiation of CD4 T Cells.** Isolation and in vitro differentiation of CD4 T cells into Th1 and Th2 cells has been described previously (1).

**RNA Isolation and Quantitative RT-PCR for Cytokines or Chemokines.** Total RNA isolation and quantitative RT-PCR has been described previously (1). Relative amounts of expression were normalized by the amount of *hprt* or *actb*. The sequences used for quantitative PCR are listed in Table S2.

**Immunoblot Analysis.** Cell extracts were resolved on 10% (wt/vol) SDS/PAGE and transferred to a PVDF membrane (Bio-Rad). The membrane was blocked with 5% (wt/vol) skim milk in Tris-buffered saline with Tween (TBST, 50 mM Tris, 150 mM NaCl, 0.05% Tween20; pH 7.6) (incubated 1 h at room temperature). The membrane was then probed with the antibody against YY1 (Santa Cruz, sc-1703), GATA3 (Santa Cruz, sc-268), or  $\beta$ -Actin (Santa Cruz, sc-47778), diluted 1:100 or 1:1,000 in TBST overnight at 4 °C. Then, an HRP-conjugated antibody against rabbit or mouse or goat IgG (Biolegend) diluted at 1:2,000 in 5% skim milk TBST was added for 1 h at room temperature. The signal was detected on an X-ray film by ECL reaction.

**Retroviral Transduction.** Mouse *yy1* cDNA was cloned into MIEG3 retroviral vector. A total of  $1-2 \times 10^6$  Phoenix Eco cells were transfected with empty MIEG3 or MIEG3-*yy1* in combination with the pCL-Eco helper vector. A culture supernatant containing high titers of retrovirus was collected after 48 h of trans-

fection. Purified naive CD4 T cells were activated with plate-bound anti-CD3 (5  $\mu$ g/mL) and mIL-2 (1  $\mu$ g/mL) for 24 h. Next, activated T cells were spin-infected in 1 mL of retrovirus-containing supernatant with polybrene (4  $\mu$ g/mL) at  $1,500 \times g$  for 90 min at 32 °C. After the spin, infected cells were incubated for 3 d in a Th1 or Th2 polarizing condition. Then, cells were restimulated for intracellular cytokines analysis, or GFP<sup>+</sup> cells were sorted and restimulated with anti-CD3 for 4 h for quantitative RT-PCR.

**Intracellular Cytokine Staining.** Cells were restimulated with 1  $\mu$ M ionomycin (Sigma) and 10 nM PMA (Sigma) with Golgi stop (BD) for 4 h. Intracellular staining was performed using Cytofix/cytoperm kit (BD) according to the manufacturer's directions. Flow cytometric analysis was done using FACS Caliber (BD).

**Cell Transfection and Dual Luciferase Assay.** Expression vectors for *gata3* and *yy1* were constructed from the CMV-base expression vector (pCMVSPORT6). Cell transfection into EL4, a mouse thymoma cell line, and measurement of dual luciferase was performed as previously described (4) with minor modifications. Transfection efficiency was normalized by dividing *Firefly* luciferase activity by *Renilla* luciferase activity.

**DNA Methylation Analysis.** DNA methylation analysis using bisulfate modification was performed as described (1).

**Chromosome Conformation Capture Assay.** Chromosome conformation capture (3C) analysis was performed as described previously (5) with minor modification. The purified DNA was amplified using the TaqMan qPCR method. Primers used are listed in Table S3.

**Coimmunoprecipitation.** HEK 293T cell were transfected with pCMV-*yy1* and pCMV-*gata3*. Two days after transfection, cell lysates were made with a lysis buffer and then precleared with control IgG followed by protein A/G (Santa Cruz) treatment. Precleared lysates were incubated overnight at 4 °C with monoclonal anti-GATA3, polyclonal anti-YY1, or normal IgG. Then, protein A/G beads were added, followed by incubation for an additional 2 h. Immunocomplexes were washed and resuspended in an SDS loading buffer. Immunoblot analysis was performed as described previously.

**Immunofluorescence Assay and in situ Proximity Ligation Assay.** CD4 T cells were fixed onto poly-L-lysine-coated coverglass (BD Science) in 2% paraformaldehyde for 15 min at room temperature, washed with PBS, and permeabilized with 0.5% (vol/vol) Triton X-100 for 10 min on ice. The cells were washed with PBS, and nonspecific binding was blocked by incubation in 10% bovine serum in PBS for 1 h at room temperature. Then the cells were incubated with an anti-YY1 antibody (Santa Cruz, sc-1703) or an anti-GATA3 antibody (Santa Cruz, sc-268) in 10% (vol/vol) bovine serum in PBS for 2 h at room temperature.

For the immunofluorescence assay, Alexa Flour 647-conjugated anti-mouse IgG (Invitrogen A21236) or Alexa Flour 546-conjugated anti-rabbit IgG (Invitrogen A11035) in PBS with 10% bovine serum was added and incubated for 1 h at room temperature. After the cells were washed extensively with PBS (10% buffered saline), DNA was counterstained with Vectashield Mounting Medium with DAPI (Vector). Images were recorded with an Olympus BX53 fluorescence microscope.

For the in situ proximity ligation assay, Duolink (Olink Biosciences) in situ proximity ligation assay was performed according to the manufacturer's protocol. Proximity ligation assay probes were













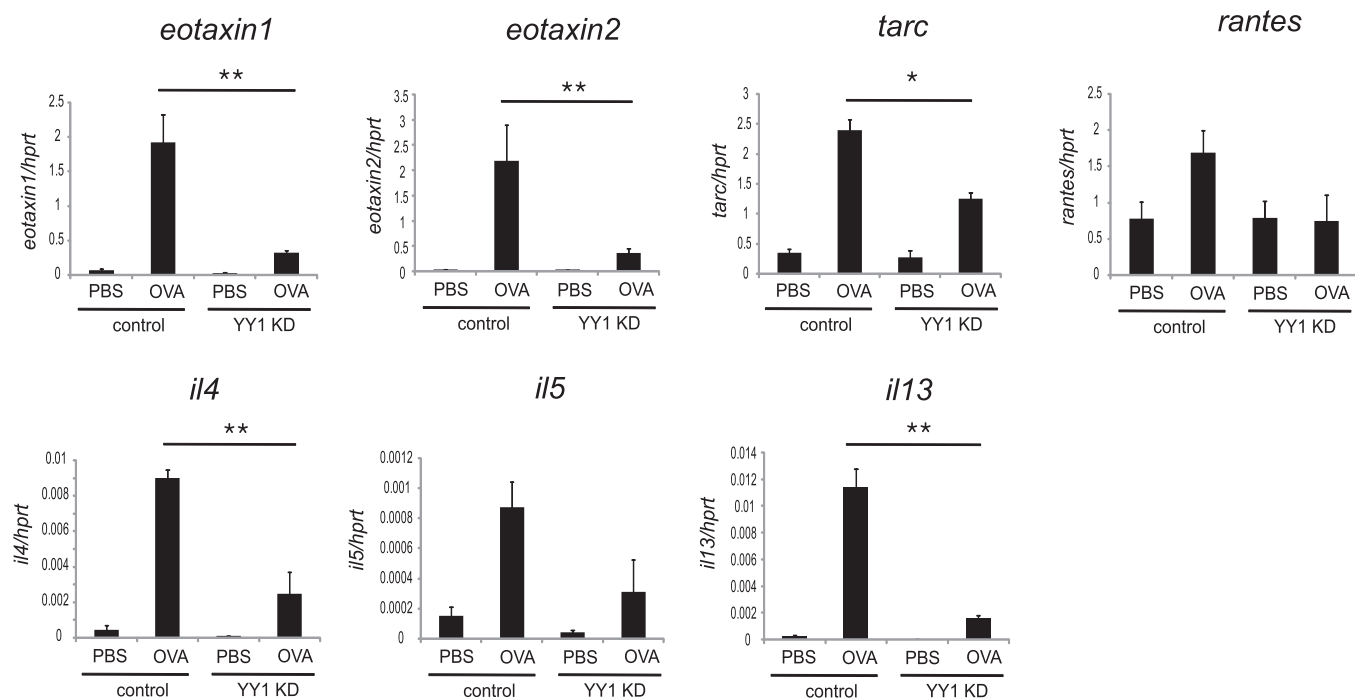

**Fig. 58.** Cytokine and chemokine gene expression in control and YY1 KD mice. Mice were sensitized and challenged with OVA or control PBS as described in the *Materials and Methods* section. Total RNA from the lung of the mice was isolated, and the expression of chemokine and cytokine genes was analyzed by quantitative RT-PCR. Error bars indicate SD ( $n = 3$ ). Statistical difference between control Th2 and YY1KD Th2 was analyzed by Student  $t$  test.  $n = 3$ . \* $P < 0.05$ , \*\* $P < 0.01$ . Data represent two independent experiments with similar results.

**Table S1. Primers for chromatin immunoprecipitation**

| Primer name       | Sequence                          |
|-------------------|-----------------------------------|
| IL-4 promoter Fw  | GCAGGATGACAACACTAGCTGGG           |
| IL-4 promoter Rv  | ACGGCACAGAGCTATTGATGG             |
| IL-5 promoter Fw  | TTTCTCAGAGAGAGAATAAATTGCTT        |
| IL-5 promoter Rv  | GCTGGCCTTCAGCAAAGG                |
| IL-13 promoter Fw | ACCCAGAACCTGGAAACCCT              |
| IL-13 promoter Rv | GTGGCCGCTAAAGGAAAGAT              |
| CNS-1 Fw          | CACACACTGGTCCACTGTGATG            |
| CNS-1 Rv          | GACGCAGGCACCAAAATAAA              |
| CNS-2 Fw          | ATCACGTCTTACCCAAACA               |
| CNS-2 Rv          | TGTGGGAGAGCGTCTGATCTG             |
| RHS7 - Fw         | TGC CTG CCC TGC AAA CA            |
| RHS7 - Rv         | TGT GGG AGG AGA TAG GAC TCT TAC C |
| RHS6b - Fw        | CAC CTT TGT CAC TTA AAC ACA TCG T |
| RHS6b - Rv        | GCA GCC AGT GCT CCT AAG GA        |
| RHS6a Fw          | GGC TCC CTC TGC TCT GAC T         |
| RHS6a Rv          | TAA AAA GGG AAA ATG GTA ACA AAA   |
| RHS5 Fw           | AAT TTC CCT CCT TGT TTG TCG T     |
| RHS5 Rv           | CTG CTC ACT GCG CTT TAG ATG       |
| HSVa Fw           | CCC TCC ATA CAG TTC CTG CAG TA    |
| HSVa Rv           | ACC AGG GCA CTT AAA CAT TGC T     |
| HSIV Fw           | CTG CAT ACC TTC CCT GAT TGG       |
| HSIV Rv           | CCC TGC CCA CAT GAA ATA CC        |
| HSII Fw           | AGGCCTTTTCTGGTACCTAACA            |
| HSII Rv           | GTCCCTCCCACTACAAATGGA             |
| CGRE Fw           | GTCCTTATCGACCCCATC                |
| CGRE Rv           | AAAGGCTTGGGAAACAC                 |



**Table S2. Primers for quantitative RT-PCR**

| Primer name             | Sequence                                          |
|-------------------------|---------------------------------------------------|
| <i>il4</i> sense        | 5'-AGATCATCGGCATTTTGAACG-3'                       |
| <i>il4</i> anti-sense   | 5'-TTTGGCACATCCATCTCCG-3'                         |
| <i>il4</i> probe        | (FAM)-5'-TCACAGGAGAAGGGACGCCATGC-3'-(Tamra)       |
| <i>ifng</i> sense       | 5'-GGATGCATTTCATGAGTATTGC-3'                      |
| <i>ifng</i> anti-sense  | 5'-CCTTTCCGCTTCTGAGG-3'                           |
| <i>ifng</i> probe       | (FAM)-5'-TTTGAGGTCAACAACCCACAGGTCCA-3'-(Tamra)    |
| <i>hprt</i> sense       | 5'-CTGGTGAAGGACCTCTCG-3'                          |
| <i>hprt</i> anti-sense  | 5'-TGAAGTACTCATTATAGTCAAGGGCA-3'                  |
| <i>hprt</i> probe       | (FAM)-5'-TGTTGGATACAGGCCAGACTTTGTTGGAT-3'-(Tamra) |
| <i>il5</i> sense        | 5'-CGCTCACCGAGCTCTGTTG-3'                         |
| <i>il5</i> anti-sense   | 5'-CCAATGCATAGCTGGTGATTTT-3'                      |
| <i>il5</i> probe        | FAM-5'-CAATGAGACGATGAGGCTTCTGTCCC-3'-Tamra        |
| <i>il13</i> sense       | 5'-GCTTATTGAGGAGCTGAGCAACA-3'                     |
| <i>il13</i> anti-sense  | 5'-GGCCAGGTCCACACTCCATA-3'                        |
| <i>il13</i> probe       | FAM-5'-CAAGACCAGACTCCCCTGTGCAACG-3'-Tamra         |
| <i>gata3</i> sense      | 5'-AGAACCGGCCCTTATCAA-3'                          |
| <i>gata3</i> anti-sense | 5'-AGTTCGCGCAGGATGTCC-3'                          |
| <i>gata3</i> probe      | FAM-5'-CCAAGCGAAGGCTGTCCGAG-3'-Tamra              |
| <i>tbx21</i> sense      | 5'-CAACAACCCCTTGCCAAAG-3'                         |
| <i>tbx21</i> anti-sense | 5'-TCCCCAAGCAGTTGACAGT-3'                         |
| <i>tbx21</i> probe      | FAM-5'-CCGGGAGAAGTTTGTGATCCATGTACGC-3'-Tamra      |
| <i>actb</i> F           | CGTGAAAAGATGACCCAGATCA                            |
| <i>actb</i> R           | TGGTACGACCAGAGGCATACAG                            |
| <i>actb</i> probe       | FAM TCAACACCCAGCCATGTACGTAGCC Tamra               |

**Table S3. Primers for the 3C assay**

| Primer name            | Sequence               |
|------------------------|------------------------|
| IL4P-CNS1F             | CTTGGGCAATGAGATGG      |
| IL4P-CNS1 R            | TTCTTGGGCCTGGAGAG      |
| IL4P-CNS2 F            | CTTGGGCAATGAGATGG      |
| IL4P-CNS2 R            | TTCTTGGGCCTGGAGAG      |
| IL4P-IL5P F            | ATTCTTGGGCAATGAGATG    |
| IL4P-IL5P R            | CAGGTCCTGCCAGAGCTAA    |
| IL4P-IL13P F           | ATTCTTGGGCAATGAGATG    |
| IL4P-IL13P R           | GCAGGGGAAATGCCTTATC    |
| IL4P-RHS45 F           | ATTCTTGGGCAATGAGATG    |
| IL4P-RHS45 R           | GAACAAACCCGAAAGAGACAA  |
| IL4P-RHS6 F            | CTTGGGCAATGAGATGG      |
| IL4P-RHS6 R            | TGAAAGAAGAAATGCTTGTGAA |
| IL4P-RHS7 F            | CTTGGGCAATGAGATGG      |
| IL4P-RHS7 R            | ATGTGACAGCAGGGCTACG    |
| IL4P probe (Th2 locus) | AGGAGGGAAGGTGCTTGCCG   |
| IL4P-GAPDH F           | CTTGGGCAATGAGATGG      |
| IL4P-GAPDH R           | GCAAACCTCCTCAAGTCAT    |
| IL4P-GAPDH probe       | AGGAGGGAAGGTGCTTGCCG   |
